# Supplementary material for: Navigating challenges in radiography research: radiographers’ perspectives in Saudi Arabia
Source: PeerJ. 2024 Sep 20;12:e18125. doi: 10.7717/peerj.18125 (PMC11418811; doi:10.7717/peerj.18125)
Supplement: Supplemental Information 2 — The data shows radiographers’ research engagement, perceptions, and educational needs. The data covered several key areas: demographic Information, research involvement, barriers to research, facilitators for engagement, and self-assessed research competencies. [file peerj-12-18125-s002.xlsx]

## Sheet: ورقة1
#	Gender	Age	Discipline	Region	Workplace	Employment Status	Years of Experience	Highest Qualification	Position	Are you familiar with the research strategy at your workplace?	Are you currently undertaking further study?	Are you currently (or have you ) involved in any medical radiations related research?	Which of the following research activities have you participated in at your workplace after graduating as a radiographer?	Indicate up to three most important reason(s) for undertaking the research activities at your workplace after graduating as a radiographer	How many research projects have you been involved?	indicate up to three reason(s) NOT undertaking the research activities at your workplace after graduating as a radiographer	I have sufficient knowledge about scientific research process	I have sufficient skills to search background literature	I have sufficient skills to critically evaluate research articles	I have sufficient English language skills	I have sufficient knowledge about research methodology	I have sufficient knowledge about statistical analyses	I am capable of participating in radiography research project	I am capable of initiating a radiography research project	Which are the three most important factors of the following that promote or might promote your participation in research projects?	Which are the three most essential factors of the following that prevent or might prevent your participation in research projects?	Research is needed in radiography to promote the radiography profession	Research is needed in radiography to provide the evidence base for radiographic practice	Clinical decisions in radiographic practice should be based on research evidence	Radiographers with a radiography education are competent to conduct radiography research	Radiographers with a master’s degree are competent to conduct radiography research	Radiographers with a doctoral/licentiate degree are competent to conduct radiography research	Radiographers should be initiators of radiographic research projects	Radiographers should be in charge of radiographic research projects	Radiographic research projects should be initiated and led by healthcare institutions only	Radiographic research projects should be initiated and led by educational institutions only	Cooperation between educational and healthcare institutions in conducting radiography research is important	have been involved in over the last 5 years
1	Female	35-44	Radiography	Western Region	Public Hospital	Full time	16-20	Masters degree	Radiographer in clinical practice	No	No	No				There is no research culture at my workplace;I am not aware of the potential research projects to participate;I don’t have ideas for research projects;	1	1	1	4	2	1	1	2	I get research training opportunities ;Employing experienced radiography researchers for mentorship;	Lack of knowledge and skills to conduct research;Insufficient time at work to conduct research;Lack of knowledge about potential research projects to participate البحثية المحتملة التي يمكن المشاركة بها;Lack of radiography research culture at workplace;Lack of support from other professionals (academics, physicists, radiologists);	5	5	5	2	3	5	5	5	1	1	5	None;
2	Male	25-34	Radiography	Western Region	Private Hospital	Full time	0-5	Bachelor degree	Radiographer in clinical practice	No	No	No				Lack of time to engage in research at my workplace;I am not aware of the potential research projects to participate;I don’t have ideas for research projects;	5	5	5	5	5	5	5	5	Employing experienced radiography researchers for mentorship ;Recognition at organizational level ;Being a member of a research group;	Lack of interest and motivation;Lack of support from other professionals (academics, physicists, radiologists);	5	5	5	5	5	5	5	5	5	5	5	Presentations (oral and poster);
3	Female	25-34	Radiography	Eastern Region	Public Hospital	Full time	0-5	Bachelor degree	Radiographer in clinical practice	No	No	No				Lack of time to engage in research at my workplace;I am not aware of the potential research projects to participate;I don’t have ideas for research projects;	3	2	2	2	3	1	3	3	I get research training opportunities ;أI get funding and other material resources;I receive support from my colleagues (other radiographers);Being a member of a research group;Recognition at organizational level ;	Lack of knowledge and skills to conduct research;Insufficient time at work to conduct research;	4	3	4	4	4	5	4	4	4	4	4	Presentations (oral and poster);
4	Male	25-34	Radiography	Southern Region	Public Hospital	Educational leave	0-5	Masters degree	Radiographer in clinical practice	Yes	No	Yes	Writing the research protocol;Presenting results in a conference;	For professional development;To improve patient care;To advance the profession of radiographers;	Under 5		5	5	5	5	4	3	5	5	I get research training opportunities ;I get assigned working time to conduct research;أI get funding and other material resources;I receive support from my colleagues (other radiographers);Being a member of a research group;Employing experienced radiography researchers for mentorship ;	Insufficient time at work to conduct research;	5	5	4	4	5	5	5	4	5	5	4	Grant applications (successful and unsuccessful);Published journal articles;
5	Male	35-44	Radiography	Southern Region	Public Hospital	Full time	11-15'	Masters degree	Radiographer in clinical practice	No	No	Yes	Applying for ethical committee;Reviewing the background literature;Collecting the data;Analyzing the data;Writing a scientific article;		Under 5		4	3	3	3	3	3	4	3	Employing experienced radiography researchers for mentorship ;Recognition at organizational level ;Being a member of a research group;	Insufficient time at work to conduct research;Lack of funding and other material resources;Lack of radiography research culture at workplace;	4	4	4	3	4	4	3	3	3	4	5	Presentations (oral and poster);Published journal articles;
6	Male	25-34	Radiography	Western Region	Public Hospital	Full time	6-10'	Bachelor degree	Manager or equivalent	No	No	Yes	Applying for ethical committee;	As a part of working task	Under 5		2	3	3	4	3	3	3	3	I receive support from my colleagues (other radiographers);	Lack of knowledge and skills to conduct research;Insufficient time at work to conduct research;	5	5	5	5	5	5	5	4	4	4	4	Published journal articles;
7	Male	25-34	Radiography	Western Region	Public Hospital	Full time	6-10'	Bachelor degree	Radiographer in clinical practice	Yes	No	No				Lack of passion among radiographers (other); difficulty in getting ethical approval (other).	4	3	2	4	3	3	2	3	I get research training opportunities ;I get funding and other material resources;I receive support from my colleagues (other radiographers);I receive support from department manager and/or higher management العليا;I receive support from other professionals (academics, physicists, radiologists);	Lack of interest and motivation;Lack of funding and other material resources;Lack of support from my colleagues (other radiographers);Lack of support from department manager and/or higher management;Lack of support from other professionals (academics, physicists, radiologists);	4	3	3	4	4	4	3	3	4	3	4	Published journal articles;
8	Male	25-34	Radiography	Southern Region	Semi-public Hospital	Full time	6-10'	Bachelor degree	Radiographer in clinical practice	No	No	Yes	Collecting the data;	For professional development	Under 5		4	4	3	4	3	3	4	4	I get research training opportunities ;	Lack of interest and motivation;	5	5	5	5	4	4	4	4	5	5	4	Published journal articles;
9	Male	25-34	Radiography	Southern Region	Private Hospital	Full time	0-5	Bachelor degree	Radiographer in clinical practice	No	No	No				I don’t have sufficient skills for participating in research projects;I am not interested in participating in research projects;There is no research culture at my workplace;	1	1	1	4	2	1	2	1	Employing experienced radiography researchers for mentorship ;	Lack of knowledge and skills to conduct research;Insufficient time at work to conduct research;Lack of interest and motivation;Lack of support from other professionals (academics, physicists, radiologists);Lack of radiography research culture at workplace;	5	5	5	3	5	5	5	1	5	5	5	None;
10	Male	35-44	Radiography	Southern Region	Public Hospital	Full time	11-15'	Bachelor degree	Radiographer in clinical practice	Yes	Yes	No				I don’t have sufficient skills for participating in research projects;	1	1	1	2	1	1	4	4	Employing experienced radiography researchers for mentorship ;	Lack of knowledge and skills to conduct research;	5	5	5	2	4	4	2	2	4	4	4	None;
11	Female	25-34	Radiography	Middle Region	Private Hospital	Full time	0-5	Bachelor degree	Radiographer in clinical practice	No	No	No				I am not aware of the potential research projects to participate;I don’t see any benefit in participating in research projects;There is no research culture at my workplace;	2	3	2	1	2	1	1	1	I get research training opportunities ;Recognition at organizational level ;Being a member of a research group;	Lack of knowledge and skills to conduct research;Lack of interest and motivation;Lack of funding and other material resources;	5	5	5	5	5	5	5	5	5	5	5	None;
12	Male	25-34	Radiography	Northern Region	Public Hospital	Educational leave	6-10'	Masters degree	Radiographer in clinical practice	Yes	Yes	Yes	Collecting the data;	To enhance promotion prospects; For professional developmentTo provide evidence based radiography practice;	Under 5		4	4	4	4	4	2	3	3	أI get funding and other material resources;I receive support from my colleagues (other radiographers);	Insufficient time at work to conduct research;	4	3	4	4	4	5	4	4	2	2	4	Published journal articles;
13	Male	25-34	Radiography	Western Region	Private Hospital	Full time	0-5	Bachelor degree	Radiographer in clinical practice	No	No	No				Lack of time to engage in research at my workplace;There is no research culture at my workplace;	3	4	2	4	4	3	4	3	I get assigned working time to conduct research;I receive support from department manager and/or higher management العليا;	Insufficient time at work to conduct research;Lack of knowledge and skills to conduct research;Lack of support from department manager and/or higher management;	5	4	5	4	4	5	4	3	4	3	5	None;
14	Male	25-34	Radiography	Western Region	Private Hospital	Full time	0-5	Bachelor degree	Radiographer in clinical practice	No	No	Yes	Applying for hospital or other approval;Collecting the data;Analyzing the data;	For professional development;To advance the profession of radiographers;	Under 5		4	3	2	3	4	3	3	3	I get assigned working time to conduct research;I receive support from my colleagues (other radiographers);I receive support from department manager and/or higher management العليا;Employing experienced radiography researchers for mentorship ;	Lack of support from my colleagues (other radiographers);Lack of interest and motivation;Insufficient time at work to conduct research;Lack of support from department manager and/or higher management;	5	4	3	4	3	3	4	4	4	4	4	Published journal articles;
15	Male	25-34	Radiography	Western Region	Private Hospital	Full time	0-5	Bachelor degree	Radiographer in clinical practice	No	No	Yes	Collecting the data;Writing a scientific article;Presenting results in a conference;Writing the research protocol;	To advance the profession of radiographers;	Under 5		4	4	4	4	3	5	5	5	I get research training opportunities ;I get assigned working time to conduct research;أI get funding and other material resources;I receive support from my colleagues (other radiographers);Recognition at organizational level ;Being a member of a research group;	Lack of knowledge and skills to conduct research;Insufficient time at work to conduct research;Lack of support from other professionals (academics, physicists, radiologists);Lack of radiography research culture at workplace;	5	4	4	4	4	4	4	3	4	3	4	Published journal articles;Presentations (oral and poster);
16	Female	25-34	Radiography	Western Region	Private Hospital	Full time	0-5	Bachelor degree	Radiographer in clinical practice	No	Yes	Yes	Writing the research protocol;Writing the research protocol;Applying for ethical committee;Applying for hospital or other approval;Reviewing the background literature;Collecting the data;Analyzing the data;Writing a scientific article;Presenting results in a conference;	To advance the profession of radiographers;As a part of working taskTo improve patient care;	Under 5		5	4	4	4	4	4	4	4	Being a member of a research group;I get assigned working time to conduct research;	Lack of knowledge and skills to conduct research;Lack of interest and motivation;Insufficient time at work to conduct research;	4	4	4	3	3	3	3	4	4	4	4	Presentations (oral and poster);
17	Male	25-34	Radiography	Western Region	Private Hospital	Full time	0-5	Bachelor degree	Radiographer in clinical practice	No	No	No				Research is not a part of my working task;I don’t see any benefit in participating in research projects;I am not interested in participating in research projects;	5	5	5	5	5	5	5	5	I receive support from my colleagues (other radiographers);	Lack of radiography research culture at workplace;	5	5	5	5	5	5	5	5	5	5	5	None;
18	Male	25-34	Radiography	Western Region	Private Hospital	Full time	6-10'	Bachelor degree	Radiographer in clinical practice	No	No	No				I don’t have sufficient skills for participating in research projects;	1	1	1	1	1	1	1	1	I get research training opportunities ;I get assigned working time to conduct research;I receive support from my colleagues (other radiographers);Being a member of a research group;	Lack of knowledge and skills to conduct research;Lack of interest and motivation;Lack of knowledge about potential research projects to participate البحثية المحتملة التي يمكن المشاركة بها;Lack of support from other professionals (academics, physicists, radiologists);Lack of radiography research culture at workplace;	5	5	5	1	3	5	3	1	1	1	5	None;
19	Female	25-34	Radiography	Southern Region	Private Hospital	Full time	0-5	Bachelor degree	Radiographer in clinical practice	Yes	No	Yes	Collecting the data;Writing the research protocol;	As a part of working taskTo improve patient care;To provide evidence based radiography practice;	Under 5		4	3	2	4	3	2	2	4	I get research training opportunities ;Recognition at organizational level ;Being a member of a research group;	Insufficient time at work to conduct research;Lack of funding and other material resources;Lack of support from department manager and/or higher management;Lack of support from other professionals (academics, physicists, radiologists);Lack of radiography research culture at workplace;	4	4	3	3	4	4	4	3	2	2	3	None;
20	Female	25-34	Radiography	Middle Region	Private Hospital	Full time	0-5	Bachelor degree	Radiographer in clinical practice	No	No	No				Research is not a part of my working task;There is no research culture at my workplace;I am not aware of the potential research projects to participate;	1	1	1	2	1	1	1	1	I get research training opportunities ;Employing experienced radiography researchers for mentorship ;Being a member of a research group;	Lack of knowledge and skills to conduct research;Lack of support from other professionals (academics, physicists, radiologists);Lack of radiography research culture at workplace;	5	5	5	4	5	5	5	5	1	1	5	None;
21	Female	25-34	Radiography	Southern Region	Private Hospital	Full time	0-5	Bachelor degree	Radiographer in clinical practice	No	No	No				I am not aware of the potential research projects to participate;There is no research culture at my workplace;	3	3	3	4	3	3	4	4	I get research training opportunities ;I get assigned working time to conduct research;I receive support from department manager and/or higher management العليا;I receive support from other professionals (academics, physicists, radiologists);Recognition at organizational level ;	Lack of knowledge and skills to conduct research;Lack of support from department manager and/or higher management;Lack of support from other professionals (academics, physicists, radiologists);Lack of knowledge about potential research projects to participate البحثية المحتملة التي يمكن المشاركة بها;Lack of support from other professionals (academics, physicists, radiologists);Lack of radiography …	5	5	4	4	5	5	4	4	3	3	5	None;
22	Female	25-34	Radiography	Middle Region	Private Hospital	Full time	0-5	Bachelor degree	Radiographer in clinical practice	No	No	No				Research is not a part of my working task;I am not interested in participating in research projects;مالي خلق ;	2	1	1	1	1	1	2	1	I get assigned working time to conduct research;Employing experienced radiography researchers for mentorship ;Recognition at organizational level ;	Insufficient time at work to conduct research;Lack of interest and motivation;Lack of support from other professionals (academics, physicists, radiologists);	1	1	1	4	5	5	4	4	3	3	3	Published journal articles;Presentations (oral and poster);
23	Male	25-34	Radiography	Eastern Region	Private Hospital	Full time	0-5	Bachelor degree	Radiographer in clinical practice	No	No	No				Lack of time to engage in research at my workplace;There is no research culture at my workplace;	3	1	1	2	2	1	4	3	I get assigned working time to conduct research;Recognition at organizational level ;Being a member of a research group;Employing experienced radiography researchers for mentorship ;I receive support from other professionals (academics, physicists, radiologists);I get research training opportunities ;I receive support from department manager and/or higher management العليا;	Lack of knowledge and skills to conduct research;Insufficient time at work to conduct research;Lack of interest and motivation;Lack of support from my colleagues (other radiographers);Lack of support from department manager and/or higher management;Lack of support from other professionals (academics, physicists, radiologists);Lack of knowledge about potential research projects to participate البح…	5	5	5	3	4	5	4	4	1	1	5	Presentations (oral and poster);
24	Male	25-34	Radiography	Middle Region	Private Hospital	Full time	0-5	Bachelor degree	Radiographer in clinical practice	No	No	No				There is no research culture at my workplace;	3	3	4	4	3	4	5	3	I get assigned working time to conduct research;I receive support from my colleagues (other radiographers);I receive support from department manager and/or higher management العليا;Recognition at organizational level ;Being a member of a research group;I get research training opportunities ;	Lack of knowledge and skills to conduct research;Lack of support from my colleagues (other radiographers);Lack of support from department manager and/or higher management;Lack of support from other professionals (academics, physicists, radiologists);Lack of knowledge about potential research projects to participate البحثية المحتملة التي يمكن المشاركة بها;Lack of radiography research culture at wo…	5	5	5	4	5	5	4	4	1	1	4	Presentations (oral and poster);
25	Male	35-44	Radiography	Middle Region	Private Hospital	Full time	16-20	Bachelor degree	Radiographer in clinical practice	No	No	No				I don’t have sufficient skills for participating in research projects;I don’t have ideas for research projects;I am not aware of the potential research projects to participate;	2	2	1	2	2	1	2	1	I get research training opportunities ;Being a member of a research group;Recognition at organizational level ;	Lack of knowledge and skills to conduct research;Lack of interest and motivation;Lack of knowledge about potential research projects to participate البحثية المحتملة التي يمكن المشاركة بها;Lack of support from other professionals (academics, physicists, radiologists);Lack of radiography research culture at workplace;	5	5	5	5	5	5	3	3	4	4	5	None;
26	Male	25-34	Radiography	Western Region	Private Hospital	Full time	0-5	Bachelor degree	Radiographer in clinical practice	No	No	No				I am not aware of the potential research projects to participate;I don’t have ideas for research projects;I don’t see any benefit in participating in research projects;	2	2	3	3	2	1	1	2	I get assigned working time to conduct research;	Lack of interest and motivation;	3	3	3	3	3	5	1	2	1	5	5	None;
27	Male	25-34	Radiography	Western Region	Public Hospital	Full time	0-5	Bachelor degree	Radiographer in clinical practice	No	No	No				There is no research culture at my workplace;Research is not a part of my working task;I don’t have sufficient skills for participating in research projects;	2	2	2	3	2	2	2	2	I receive support from my colleagues (other radiographers);I receive support from department manager and/or higher management العليا;Employing experienced radiography researchers for mentorship ;Recognition at organizational level ;I get research training opportunities ;	Lack of knowledge and skills to conduct research;Lack of interest and motivation;Lack of funding and other material resources;Lack of knowledge about potential research projects to participate البحثية المحتملة التي يمكن المشاركة بها;Lack of radiography research culture at workplace;Lack of support from other professionals (academics, physicists, radiologists);	4	4	3	3	4	5	3	2	2	2	2	Presentations (oral and poster);
28	Female	18-24	Radiography	Eastern Region	Public Hospital	Full time	0-5	Bachelor degree	Manager or equivalent	Yes	No	Yes	Collecting the data;Analyzing the data;Writing a scientific article;Presenting results in a conference;	As a part of working task To enhance promotion prospects;To advance the profession of radiographers;	"5-10"		5	5	5	5	5	5	5	5	أI get funding and other material resources;I receive support from my colleagues (other radiographers);Recognition at organizational level ;Being a member of a research group;	Lack of interest and motivation;Lack of support from other professionals (academics, physicists, radiologists);Lack of radiography research culture at workplace;	5	5	5	5	5	5	5	5	5	5	5	Presentations (oral and poster);Chapter in a book;
29	Male	18-24	Radiography	Western Region	Semi-public Hospital	Full time	0-5	Bachelor degree	Radiographer in clinical practice	No	No	Yes	Analyzing the data;Collecting the data;	For professional development; To provide evidence based radiography practice;To advance the profession of radiographers;	Under 5		4	4	3	4	4	1	4	4	Being a member of a research group;I get research training opportunities ;I get assigned working time to conduct research;	Lack of interest and motivation;Lack of support from department manager and/or higher management;Lack of knowledge about potential research projects to participate البحثية المحتملة التي يمكن المشاركة بها;	5	5	5	4	5	5	3	3	3	4	5	Published journal articles;Presentations (oral and poster);
30	Female	35-44	Radiography	Southern Region	Public Hospital	Full time	11-15'	Bachelor degree	Radiographer in clinical practice	No	No	No				There is no research culture at my workplace;	1	1	1	1	1	1	1	3	Employing experienced radiography researchers for mentorship;	Lack of knowledge and skills to conduct research;	5	5	5	5	5	5	5	5	2	2	5	None;
31	Female	25-34	Radiography	Northern Region	Private Hospital	Full time	0-5	Bachelor degree	Radiographer in clinical practice	No	No	No				I am not interested in participating in research projects;	5	5	5	5	5	5	1	1	I get assigned working time to conduct research;	Insufficient time at work to conduct research;Lack of support from other professionals (academics, physicists, radiologists);Lack of knowledge and skills to conduct research;	1	1	2	5	1	1	1	1	1	1	1	Presentations (oral and poster);
32	Female	35-44	Radiography	Eastern Region	Private Hospital	Full time	11-15'	Bachelor degree	Radiographer in clinical practice	No	No	No				There is no research culture at my workplace;Research is not a part of my working task;I don’t have sufficient skills for participating in research projects;	2	2	4	4	2	2	3	4	I get research training opportunities ;I get assigned working time to conduct research;	Lack of knowledge about potential research projects to participate البحثية المحتملة التي يمكن المشاركة بها;Lack of radiography research culture at workplace;	5	4	2	4	4	4	3	3	1	1	5	None;
33	Male	25-34	Radiography	Eastern Region	Semi-public Hospital	Full time	0-5	Bachelor degree	Radiographer in clinical practice	Yes	No	Yes	Writing a scientific article;	For professional development	Under 5		5	5	5	5	5	5	5	5	I get research training opportunities ;I receive support from my colleagues (other radiographers);Being a member of a research group;Recognition at organizational level ;	Lack of support from other professionals (academics, physicists, radiologists)	5	5	5	5	5	5	5	5	5	5	5	Presentations (oral and poster);
34	Male	25-34	Radiography	Eastern Region	Private Hospital	Full time	0-5	Bachelor degree	Radiographer in clinical practice	No	No	No				There is no research culture at my workplace;	1	5	3	5	3	3	1	1	I get research training opportunities;	Lack of knowledge and skills to conduct research;Insufficient time at work to conduct research;Lack of interest and motivation;Lack of funding and other material resources;Lack of support from department manager and/or higher management;Lack of support from other professionals (academics, physicists, radiologists);Lack of support from other professionals (academics, physicists, radiologists);Lack…	5	5	5	1	5	5	1	1	1	1	5	Presentations (oral and poster);
35	Male	25-34	Radiography	Western Region	Private Hospital	Full time	0-5	Bachelor degree	Radiographer in clinical practice	No	No	No				I am not interested in participating in research projects;	2	2	2	5	3	4	3	4	Being a member of a research group;	Lack of interest and motivation;Lack of support from department manager and/or higher management;Lack of support from other professionals (academics, physicists, radiologists);	5	5	5	5	5	5	5	4	5	5	5	Presentations (oral and poster);
36	Female	25-34	Radiography	Western Region	Private Hospital	Full time	0-5	Bachelor degree	Radiographer in clinical practice	No	No	No				There is no research culture at my workplace;Research is not a part of my working task;	4	4	2	3	3	3	4	3	I get research training opportunities ;I receive support from my colleagues (other radiographers);Recognition at organizational level ;Being a member of a research group;	Lack of interest and motivation;Lack of radiography research culture at workplace;	3	4	5	5	5	5	5	5	4	5	5	Other
37	Male	25-34	Radiography	Middle Region	Private Hospital	Full time	0-5	Bachelor degree	Radiographer in clinical practice	Yes	No	No				There is no research culture at my workplace;	4	4	4	4	4	4	4	5	I get assigned working time to conduct research;	Lack of support from my colleagues (other radiographers);	5	5	5	5	5	5	5	4	4	4	5	Presentations (oral and poster);
38	Male	18-24	Radiography	Eastern Region	Private Hospital	Full time	0-5	Bachelor degree	Radiographer in clinical practice	No	No	No				Research is not a part of my working task;I am not interested in participating in research projects;I am not aware of the potential research projects to participate;	2	2	3	3	1	1	2	1	I get funding and other material resources;I receive support from department manager and/or higher management العليا;Being a member of a research group;	Lack of knowledge and skills to conduct research;Lack of interest and motivation;Lack of support from other professionals (academics, physicists, radiologists);	5	5	4	5	5	5	3	3	3	3	5	Presentations (oral and poster);
39	Female	35-44	Radiography	Western Region	Public Hospital	Full time	11-15'	Doctoral degree	Manager or equivalent	No	No	No				I don’t have sufficient skills for participating in research projects;There is no research culture at my workplace;I am not aware of the potential research projects to participate;	2	3	2	4	3	3	3	4	Being a member of a research group;	Lack of radiography research culture at workplace;	5	5	3	3	3	3	4	3	2	2	4	None;
40	Male	35-44	Radiography	Western Region	Public Hospital	Full time	16-20	Graduate diploma	Manager or equivalent	No	No	No				I am not interested in participating in research projects;	4	3	3	3	3	3	3	3	I get research training opportunities ;I get assigned working time to conduct research;I receive support from department manager and/or higher management العليا;Being a member of a research group;	Lack of knowledge and skills to conduct research;Lack of support from department manager and/or higher management;Lack of support from other professionals (academics, physicists, radiologists);Lack of knowledge about potential research projects to participate البحثية المحتملة التي يمكن المشاركة بها;Lack of support from other professionals (academics, physicists, radiologists);	4	4	4	4	4	4	4	4	4	3	3	Research student supervision;
41	Female	35-44	Radiography	Western Region	Public Hospital	Full time	11-15'	Bachelor degree	Radiographer in clinical practice	Yes	No	No				There is no research culture at my workplace;	2	3	2	3	3	3	3	3	I get research training opportunities ;I get assigned working time to conduct research;I get funding and other material resources;Employing experienced radiography researchers for mentorship ;Recognition at organizational level ;Being a member of a research group;	Lack of funding and other material resources;Lack of knowledge and skills to conduct research;Lack of radiography research culture at workplace;Lack of support from other professionals (academics, physicists, radiologists);Lack of knowledge about potential research projects to participate البحثية المحتملة التي يمكن المشاركة بها;	5	5	5	5	5	5	5	5	5	5	5	None;
42	Female	18-24	Radiography	Southern Region	Public Hospital	Full time	0-5	Bachelor degree	Radiographer in clinical practice	Yes	No	Yes	Analyzing the data;Writing a scientific article;Applying for hospital or other approval;Applying for ethical committee;Writing the research protocol;	For professional development;To advance the profession of radiographers	Under 5		5	5	5	5	5	5	5	5	I get research training opportunities ;I receive support from my colleagues (other radiographers);I receive support from other professionals (academics, physicists, radiologists);Employing experienced radiography researchers for mentorship ;Recognition at organizational level ;Being a member of a research group;	Lack of knowledge and skills to conduct research;Insufficient time at work to conduct research;Lack of interest and motivation;Lack of funding and other material resources;Lack of support from my colleagues (other radiographers);Lack of support from other professionals (academics, physicists, radiologists);	5	5	5	5	5	5	5	5	5	5	5	Presentations (oral and poster);
43	Male	25-34	Radiography	Western Region	Semi-public Hospital	Full time	0-5	Bachelor degree	Radiographer in clinical practice	No	No	Yes	Writing a scientific article;Collecting the data;Analyzing the data;Writing the research protocol;		Under 5		3	4	2	4	3	2	4	4	I get research training opportunities ;I get assigned working time to conduct research;	Insufficient time at work to conduct research;Lack of support from department manager and/or higher management;Lack of support from other professionals (academics, physicists, radiologists);	3	2	3	1	5	5	2	3	3	2	3	Published journal articles;
44	Male	35-44	Radiography	Eastern Region	Public Hospital	Full time	11-15'	Graduate diploma	Radiographer in clinical practice	Yes	No	No				I am not aware of the potential research projects to participate;I don’t have ideas for research projects;Research is not a part of my working task;	3	3	2	2	3	2	2	2	I get research training opportunities ;I receive support from my colleagues (other radiographers);I receive support from department manager and/or higher management العليا;	Lack of knowledge and skills to conduct research;Lack of interest and motivation;Lack of support from department manager and/or higher management;Lack of knowledge about potential research projects to participate البحثية المحتملة التي يمكن المشاركة بها;	5	4	5	4	5	5	4	3	3	3	4	None;
45	Male	35-44	Radiography	Eastern Region	Public Hospital	Full time	11-15'	Graduate diploma	Radiographer in clinical practice	No	No	No				I am not aware of the potential research projects to participate;I don’t have ideas for research projects;I don’t have sufficient skills for participating in research projects;	1	1	1	1	1	1	1	1	I get research training opportunities ;I receive support from my colleagues (other radiographers);I receive support from department manager and/or higher management العليا;I receive support from other professionals (academics, physicists, radiologists);Being a member of a research group;	Lack of knowledge and skills to conduct research;Lack of support from my colleagues (other radiographers);Lack of support from department manager and/or higher management;Lack of support from other professionals (academics, physicists, radiologists);Lack of knowledge about potential research projects to participate البحثية المحتملة التي يمكن المشاركة بها;Lack of support from other professionals (…	1	1	1	1	1	1	1	1	1	1	1	None;
46	Male	35-44	Radiography	Eastern Region	Public Hospital	Full time	11-15'	Graduate diploma	Radiographer in clinical practice	No	No	No				Research is not a part of my working task;There is no research culture at my workplace;I am not aware of the potential research projects to participate;	1	4	3	4	3	2	3	3	I get research training opportunities ;I receive support from department manager and/or higher management العليا;Recognition at organizational level ;Being a member of a research group;أI get funding and other material resources;	Lack of knowledge and skills to conduct research;Lack of interest and motivation;Lack of support from department manager and/or higher management;Lack of knowledge about potential research projects to participate البحثية المحتملة التي يمكن المشاركة بها;Lack of support from other professionals (academics, physicists, radiologists);Lack of radiography research culture at workplace;	5	5	5	5	5	5	5	5	5	5	5	None;
47	Male	25-34	Radiography	Eastern Region	Private Hospital	Full time	0-5	Bachelor degree	Radiographer in clinical practice	No	No	No				Lack of time to engage in research at my workplace;	3	3	3	2	2	2	3	3	I get assigned working time to conduct research;I receive support from other professionals (academics, physicists, radiologists);Recognition at organizational level ;	Insufficient time at work to conduct research;Lack of interest and motivation;	4	4	4	4	4	3	3	3	3	3	3	None;
48	Male	35-44	Radiography	Eastern Region	Public Hospital	Full time	11-15'	Graduate diploma	Radiographer in clinical practice	No	No	No				There is no research culture at my workplace;	3	3	3	3	3	3	3	3	I get research training opportunities ;I get assigned working time to conduct research;I receive support from department manager and/or higher management العليا;Being a member of a research group;	Lack of support from department manager and/or higher management;Lack of support from my colleagues (other radiographers);Lack of radiography research culture at workplace;	4	4	4	4	4	4	4	4	4	3	3	None;
49	Female	18-24	Radiography	Middle Region	Semi-public Hospital	Educational leave	0-5	Bachelor degree	Radiographer in clinical practice	Yes	Yes	Yes	Applying for project funding	For professional development;As a part of working taskTo improve patient care;	"5-10"		3	3	4	4	3	3	4	4	I get assigned working time to conduct research;I get funding and other material resources;I get research training opportunities ;	Lack of interest and motivation;	5	3	4	3	3	4	4	5	4	3	3	Published journal articles;Presentations (oral and poster);
50	Male	25-34	Radiography	Eastern Region	Public Hospital	Full time	0-5	Bachelor degree	Radiographer in clinical practice	Yes	Yes	No				Lack of time to engage in research at my workplace;	5	5	5	5	5	5	5	5	Being a member of a research group;	Lack of radiography research culture at workplace;	5	5	5	5	5	5	5	5	5	5	5	Presentations (oral and poster);
51	Male	25-34	Radiography	Northern Region	Public Hospital	Educational leave	6-10'	Masters degree	Radiographer in clinical practice	Yes	Yes	Yes	Collecting the data;	For economic interest; For professional development	Under 5		4	3	3	3	3	3	3	4	I get assigned working time to conduct research;I receive support from my colleagues (other radiographers);I receive support from department manager and/or higher management العليا;I receive support from other professionals (academics, physicists, radiologists);	Insufficient time at work to conduct research;Lack of support from other professionals (academics, physicists, radiologists);	2	2	2	3	4	5	4	4	4	4	4	Published journal articles;
52	Male	18-24	Radiography	Western Region	Semi-public Hospital	Full time	0-5	Bachelor degree	Radiographer in clinical practice	Yes	Yes	Yes	Writing a scientific article;	To advance the profession of radiographers;As a part of working task	Under 5		5	5	5	5	5	5	5	5	Being a member of a research group;	Lack of support from other professionals (academics, physicists, radiologists);	5	5	5	5	5	5	5	5	5	5	5	Published journal articles;
53	Female	18-24	Radiography	Western Region	Private Hospital	Full time	0-5	Bachelor degree	Radiographer in clinical practice	No	No	No				Lack of time to engage in research at my workplace;There is no research culture at my workplace;	3	4	3	4	4	3	3	3	أI get funding and other material resources;I get assigned working time to conduct research;I receive support from department manager and/or higher management العليا;Employing experienced radiography researchers for mentorship ;Recognition at organizational level ;Being a member of a research group;	Insufficient time at work to conduct research;Lack of funding and other material resources;Lack of support from department manager and/or higher management;Lack of support from other professionals (academics, physicists, radiologists);Lack of radiography research culture at workplace;	5	4	4	5	5	5	2	4	3	3	5	Published journal articles;
54	Female	25-34	Radiography	Western Region	Private Hospital	Full time	0-5	Bachelor degree	Radiographer in clinical practice	No	No	No				There is no research culture at my workplace;I am not aware of the potential research projects to participate;Lack of time to engage in research at my workplace;	4	3	4	3	3	3	3	3	I get assigned working time to conduct research;I get research training opportunities ;I receive support from department manager and/or higher management العليا;Recognition at organizational level ;Being a member of a research group;	Lack of knowledge and skills to conduct research;Insufficient time at work to conduct research;Lack of interest and motivation;Lack of support from department manager and/or higher management;Lack of support from other professionals (academics, physicists, radiologists);Lack of radiography research culture at workplace;	5	5	5	5	5	5	5	4	3	3	5	None;
55	Female	25-34	Radiography	Western Region	Private Hospital	Full time	0-5	Bachelor degree	Radiographer in clinical practice	No	No	Yes	Writing the research protocol;Collecting the data;	For professional development;To enhance promotion prospects;To provide evidence based radiography practice;	Under 5		3	3	2	5	4	3	4	4	I receive support from my colleagues (other radiographers);I receive support from department manager and/or higher management العليا;I receive support from other professionals (academics, physicists, radiologists);I get assigned working time to conduct research;I get research training opportunities ;أI get funding and other material resources;Being a member of a research group;	Insufficient time at work to conduct research;Lack of funding and other material resources;Lack of support from department manager and/or higher management;Lack of support from other professionals (academics, physicists, radiologists);Lack of radiography research culture at workplace;	5	5	3	4	5	5	3	3	3	3	5	Presentations (oral and poster);Published journal articles;
56	Male	25-34	Radiography	Eastern Region	Private Hospital	Full time	0-5	Bachelor degree	Radiographer in clinical practice	No	No	No				I am not interested in participating in research projects;	3	4	3	3	3	4	4	4	I receive support from other professionals (academics, physicists, radiologists);I get funding and other material resources;I get assigned working time to conduct research;I get research training opportunities ;	Insufficient time at work to conduct research;Lack of interest and motivation;	5	4	5	4	5	5	4	4	3	3	4	None;
57	Female	18-24	Radiography	Western Region	Public Hospital	Full time	0-5	Bachelor degree	Radiographer in clinical practice	Yes	No	No				Lack of time to engage in research at my workplace;	3	2	2	4	3	3	4	4	I get research training opportunities ;	Insufficient time at work to conduct research;Lack of interest and motivation;	5	5	4	4	5	5	3	4	2	2	2	None;
58	Female	18-24	Radiography	Western Region	Public Hospital	Full time	0-5	Bachelor degree	Radiographer in clinical practice	Yes	No	Yes	Writing the research protocol;	To advance the profession of radiographers;To provide evidence based radiography practice;To improve patient care;	Under 5		5	5	5	5	5	5	5	4	I get research training opportunities ;I get assigned working time to conduct research;I receive support from my colleagues (other radiographers);I receive support from other professionals (academics, physicists, radiologists);	Insufficient time at work to conduct research;Lack of knowledge and skills to conduct research;Lack of support from other professionals (academics, physicists, radiologists);	5	5	5	5	5	5	5	5	5	5	5	None;Presentations (oral and poster);
59	Male	18-24	Radiography	Middle Region	Public Hospital	Full time	0-5	Bachelor degree	Radiographer in clinical practice	Yes	No	Yes	Collecting the data;	As a part of working task	Under 5		5	5	5	5	5	5	5	5	I get research training opportunities ;Being a member of a research group;I get assigned working time to conduct research;أI get funding and other material resources;	Insufficient time at work to conduct research;	5	5	5	5	5	5	5	5	5	5	5	None;
60	Female	18-24	Radiography	Southern Region	Private Hospital	Full time	0-5	Bachelor degree	Radiographer in clinical practice	No	No	Yes	Writing the research protocol;Writing the research protocol;	As a part of working task;For professional development;To advance the profession of radiographers;	Under 5		4	2	2	2	4	2	2	4	I get research training opportunities ;I get assigned working time to conduct research;Recognition at organizational level ;Being a member of a research group;	Insufficient time at work to conduct research;Lack of knowledge and skills to conduct research;Lack of radiography research culture at workplace;	5	5	4	3	3	3	4	4	2	2	5	Grant applications (successful and unsuccessful);Presentations (oral and poster);
61	Female	18-24	Radiography	Southern Region	Private Hospital	Full time	0-5	Bachelor degree	Radiographer in clinical practice	No	No	No				Lack of time to engage in research at my workplace;	4	4	3	4	4	3	4	4	Employing experienced radiography researchers for mentorship ;	Insufficient time at work to conduct research;Lack of support from department manager and/or higher management;Lack of knowledge about potential research projects to participate البحثية المحتملة التي يمكن المشاركة بها;Lack of support from other professionals (academics, physicists, radiologists);	5	5	5	5	5	5	5	5	5	5	5	Presentations (oral and poster);
62	Female	18-24	Radiography	Southern Region	Private Hospital	Full time	0-5	Bachelor degree	Radiographer in clinical practice	No	No	No				Research is not a part of my working task;I am not interested in participating in research projects;I am not aware of the potential research projects to participate;	2	2	2	2	2	2	4	3	I get research training opportunities ;I get assigned working time to conduct research;I receive support from my colleagues (other radiographers);I receive support from other professionals (academics, physicists, radiologists);Recognition at organizational level ;	Insufficient time at work to conduct research;Lack of knowledge and skills to conduct research;	5	5	4	4	4	5	4	4	3	3	3	Presentations (oral and poster);
63	Female	25-34	Radiography	Southern Region	Private Hospital	Full time	0-5	Bachelor degree	Radiographer in clinical practice	No	No	No				Research is not a part of my working task;Lack of time to engage in research at my workplace;There is no research culture at my workplace;	2	2	1	2	2	2	3	3	I get research training opportunities ;I get assigned working time to conduct research;I receive support from my colleagues (other radiographers);I receive support from department manager and/or higher management العليا;I receive support from other professionals (academics, physicists, radiologists);Employing experienced radiography researchers for mentorship ;Recognition at organizational level ;	Lack of knowledge and skills to conduct research;Insufficient time at work to conduct research;Lack of interest and motivation;Lack of knowledge about potential research projects to participate البحثية المحتملة التي يمكن المشاركة بها;Lack of support from other professionals (academics, physicists, radiologists);Lack of radiography research culture at workplace;	4	4	4	3	4	4	3	3	3	3	4	Presentations (oral and poster);
64	Male	25-34	Radiography	Southern Region	Private Hospital	Full time	0-5	Bachelor degree	Radiographer in clinical practice	No	No	No				There is no research culture at my workplace;I am not aware of the potential research projects to participate	5	5	5	5	5	5	5	5	I get research training opportunities ;I receive support from department manager and/or higher management العليا;Employing experienced radiography researchers for mentorship ;Being a member of a research group;	Lack of interest and motivation;Lack of funding and other material resources;Lack of support from department manager and/or higher management;Lack of radiography research culture at workplace;Lack of support from other professionals (academics, physicists, radiologists);	5	5	5	5	5	5	5	5	5	5	5	None;
65	Female	18-24	Radiography	Northern Region	Private Hospital	Full time	0-5	Bachelor degree	Radiographer in clinical practice	No	No	No				There is no research culture at my workplace;Lack of time to engage in research at my workplace;	4	1	1	1	2	2	5	5	I get research training opportunities ;I receive support from my colleagues (other radiographers);	Insufficient time at work to conduct research;Lack of knowledge and skills to conduct research;	3	3	5	5	5	5	5	5	5	5	5	None;
66	Male	25-34	Radiography	Western Region	Public Hospital	Educational leave	6-10'	Bachelor degree	Radiographer in clinical practice	No	Yes	Yes	Writing the research protocol;Writing a scientific article;Analyzing the data;Collecting the data;Reviewing the background literature;Applying for hospital or other approval;Applying for ethical committee;	To improve patient care; For professional development	Under 5		3	4	3	5	3	3	4	4	I get research training opportunities ;I get assigned working time to conduct research;Recognition at organizational level ;	Insufficient time at work to conduct research;Lack of interest and motivation;Lack of support from department manager and/or higher management;Lack of support from other professionals (academics, physicists, radiologists);Lack of radiography research culture at workplace;	4	5	4	3	3	3	5	4	4	3	4	Presentations (oral and poster);
67	Female	25-34	Radiography	Western Region	Private Hospital	Full time	0-5	Bachelor degree	Radiographer in clinical practice	No	No	No				I don’t have ideas for research projects;I am not interested in participating in research projects;I don’t see any benefit in participating in research projects;	2	2	2	4	2	2	4	3	I get research training opportunities ;I receive support from my colleagues (other radiographers);I receive support from other professionals (academics, physicists, radiologists);	Lack of interest and motivation;Insufficient time at work to conduct research;	4	5	5	5	5	5	5	5	5	5	5	None;
68	Male	45-54	Radiography	Middle Region	Public Hospital	Full time	11-15'	Graduate diploma	Radiographer in clinical practice	No	No	No				Research is not a part of my working task;Lack of time to engage in research at my workplace;I am not interested in participating in research projects;	3	4	4	3	4	5	5	5	I get research training opportunities ;I get assigned working time to conduct research;I receive support from my colleagues (other radiographers);I receive support from other professionals (academics, physicists, radiologists);	Lack of knowledge and skills to conduct research;Insufficient time at work to conduct research;Lack of interest and motivation;Lack of funding and other material resources;Lack of support from other professionals (academics, physicists, radiologists);Lack of radiography research culture at workplace;	5	5	5	5	5	5	5	5	5	5	5	Presentations (oral and poster);
69	Female	18-24	Radiography	Western Region	Private Hospital	Full time	0-5	Bachelor degree	Radiographer in clinical practice	No	No	Yes	Collecting the data;Writing a scientific article;	For professional development;To improve patient care;To provide evidence based radiography practice;	Under 5		2	2	2	2	2	2	2	2	I get research training opportunities ;I get assigned working time to conduct research;	Lack of interest and motivation;Lack of support from other professionals (academics, physicists, radiologists);Lack of support from other professionals (academics, physicists, radiologists);	5	5	5	5	5	5	5	5	5	5	5	Presentations (oral and poster);
70	Female	18-24	Radiography	Western Region	Private Hospital	Full time	0-5	Bachelor degree	Radiographer in clinical practice	No	No	No				Research is not a part of my working task;Lack of time to engage in research at my workplace;There is no research culture at my workplace;	2	2	2	2	2	2	2	2	أI get funding and other material resources;I receive support from my colleagues (other radiographers);I receive support from department manager and/or higher management العليا;Employing experienced radiography researchers for mentorship ;Being a member of a research group;	Insufficient time at work to conduct research;Lack of radiography research culture at workplace;Lack of knowledge about potential research projects to participate البحثية المحتملة التي يمكن المشاركة بها;Lack of interest and motivation;Lack of funding and other material resources;Lack of knowledge and skills to conduct research;	5	5	5	5	5	5	5	5	5	5	5	Other
71	Male	35-44	Radiography	Middle Region	Public Hospital	Full time	11-15'	Masters degree	Radiographer in clinical practice	Yes	No	No				I am not aware of the potential research projects to participate;	3	3	4	4	4	4	4	3	أI get funding and other material resources;Employing experienced radiography researchers for mentorship ;	Lack of funding and other material resources;Lack of support from other professionals (academics, physicists, radiologists);	4	4	3	3	3	4	2	2	3	3	5	Presentations (oral and poster);
72	Female	25-34	Radiography	Eastern Region	Public Hospital	Full time	11-15'	Bachelor degree	Radiographer in clinical practice	No	Yes	No				Lack of time to engage in research at my workplace;There is no research culture at my workplace;I am not aware of the potential research projects to participate;	2	1	1	5	1	1	1	1	I get research training opportunities ;I get assigned working time to conduct research;I receive support from my colleagues (other radiographers);Recognition at organizational level ;Being a member of a research group;	Lack of knowledge and skills to conduct research;Insufficient time at work to conduct research;Lack of interest and motivation;Lack of support from my colleagues (other radiographers);Lack of knowledge about potential research projects to participate البحثية المحتملة التي يمكن المشاركة بها;Lack of support from other professionals (academics, physicists, radiologists);Lack of radiography research …	5	5	5	5	5	5	5	4	3	3	5	None;
73	Female	25-34	Radiography	Eastern Region	Private Hospital	Full time	0-5	Bachelor degree	Radiographer in clinical practice	No	No	No				Couldn't find any research to participate in (other)	3	3	3	3	3	3	3	3	I get research training opportunities ;Employing experienced radiography researchers for mentorship ;Recognition at organizational level ;I get assigned working time to conduct research;أI get funding and other material resources;	Lack of knowledge and skills to conduct research;Insufficient time at work to conduct research;Lack of interest and motivation;Lack of funding and other material resources;Lack of support from my colleagues (other radiographers);Lack of support from department manager and/or higher management;Lack of support from other professionals (academics, physicists, radiologists);Lack of knowledge about po…	3	3	3	3	3	3	3	3	3	3	3	None;
74	Female	25-34	Radiography	Southern Region	Public Hospital	Educational leave	6-10'	Bachelor degree	Radiographer in clinical practice	No	Yes	Yes	Collecting the data;	As a part of working task	Under 5		2	1	1	1	1	1	1	1	I get research training opportunities ;I get assigned working time to conduct research;I receive support from other professionals (academics, physicists, radiologists);Employing experienced radiography researchers for mentorship ;	Lack of knowledge and skills to conduct research;Insufficient time at work to conduct research;Lack of knowledge about potential research projects to participate البحثية المحتملة التي يمكن المشاركة بها;Lack of support from other professionals (academics, physicists, radiologists);	5	5	5	3	3	4	3	3	3	3	5	Published journal articles;
75	Male	35-44	Radiography	Western Region	Public Hospital	Full time	11-15'	Graduate diploma	Radiographer in clinical practice	No	No	No				There is no research culture at my workplace;I am not aware of the potential research projects to participate;	3	3	3	1	2	3	3	3	I get research training opportunities ;أI get funding and other material resources;I receive support from my colleagues (other radiographers);I receive support from department manager and/or higher management العليا;I receive support from other professionals (academics, physicists, radiologists);Employing experienced radiography researchers for mentorship ;	Lack of knowledge and skills to conduct research;Lack of interest and motivation;Lack of funding and other material resources;Lack of support from my colleagues (other radiographers);Lack of support from department manager and/or higher management;Lack of knowledge about potential research projects to participate البحثية المحتملة التي يمكن المشاركة بها;Lack of support from other professionals (ac…	5	5	5	3	5	5	4	4	4	4	4	None;
76	Male	25-34	Radiography	Northern Region	Private Hospital	Full time	0-5	Bachelor degree	Radiographer in clinical practice	No	No	Yes	Writing a scientific article;	As a part of working task	Under 5		5	5	5	5	5	5	5	5	I get research training opportunities ;I get assigned working time to conduct research;أI get funding and other material resources;I receive support from my colleagues (other radiographers);I receive support from department manager and/or higher management العليا;I receive support from other professionals (academics, physicists, radiologists);Employing experienced radiography researchers for ment…	Insufficient time at work to conduct research;Lack of knowledge and skills to conduct research;Lack of interest and motivation;Lack of funding and other material resources;	5	5	5	5	5	5	5	5	5	5	5	Chapter in a book;Presentations (oral and poster);
77	Male	35-44	Radiography	Southern Region	Public Hospital	Full time	11-15'	Masters degree	Radiographer in clinical practice	No	No	Yes	Applying for ethical committee;Collecting the data;Analyzing the data;Writing a scientific article;Presenting results in a conference;	To get higher degree	Under 5		4	3	3	3	3	3	4	4	Recognition at organizational level ;Being a member of a research group;	Lack of interest and motivation;Lack of radiography research culture at workplace;	4	4	4	2	4	5	3	3	3	5	5	Published journal articles;Presentations (oral and poster);
78	Male	25-34	Radiography	Northern Region	Private Hospital	Full time	0-5	Bachelor degree	Radiographer in clinical practice	No	No	Yes	Writing the research protocol;Writing the research protocol;Applying for project funding Applying for ethical committee;Applying for hospital or other approval;Collecting the data;توظيف المشاركين - Recruitment of participants;Analyzing the data;Writing a scientific article;Presenting results in a conference;	To improve patient care;To advance the profession of radiographers;	Under 5		5	5	4	5	5	3	5	5	I get assigned working time to conduct research;أI get funding and other material resources;I receive support from my colleagues (other radiographers);I receive support from department manager and/or higher management العليا;I receive support from other professionals (academics, physicists, radiologists);Employing experienced radiography researchers for mentorship ;Being a member of a research gr…	Insufficient time at work to conduct research;Lack of funding and other material resources;Lack of radiography research culture at workplace;	5	5	5	5	5	5	5	5	1	1	5	Published journal articles;Grant applications (successful and unsuccessful);Presentations (oral and poster);Chapter in a book;
79	Female	25-34	Radiography	Western Region	Semi-public Hospital	Full time	0-5	Bachelor degree	Radiographer in clinical practice	No	No	No				Research is not a part of my working task;Lack of time to engage in research at my workplace;I don’t have ideas for research projects;	3	2	2	4	3	2	3	2	Being a member of a research group;I get research training opportunities ;I get assigned working time to conduct research;	Lack of knowledge and skills to conduct research;Insufficient time at work to conduct research;Lack of knowledge about potential research projects to participate البحثية المحتملة التي يمكن المشاركة بها;	4	4	3	2	4	5	3	3	2	2	4	Presentations (oral and poster);
80	Male	25-34	Radiography	Western Region	Semi-public Hospital	Full time	0-5	Bachelor degree	Radiographer in clinical practice	No	No	Yes	Writing the research protocol;Writing the research protocol;Applying for project funding Applying for ethical committee;Applying for hospital or other approval;Reviewing the background literature;Collecting the data;Analyzing the data;Writing a scientific article;Presenting results in a conference;	For economic interest;To improve patient care;To provide evidence based radiography practice;	"5-10"		5	5	5	5	5	5	5	5	I get assigned working time to conduct research;أI get funding and other material resources;Being a member of a research group;I receive support from other professionals (academics, physicists, radiologists);I receive support from department manager and/or higher management العليا;I get research training opportunities ;	Lack of interest and motivation;Lack of funding and other material resources;Lack of support from department manager and/or higher management;Lack of radiography research culture at workplace;	5	5	5	2	5	5	4	3	5	5	5	Research student supervision;Chapter in a book;
81	Male	35-44	Radiography	Middle Region	Public Hospital	Full time	16-20	Bachelor degree	Radiographer in clinical practice	No	No	No				Lack of time to engage in research at my workplace;I don’t have sufficient skills for participating in research projects;	2	2	2	2	2	2	2	2	I get assigned working time to conduct research;I get funding and other material resources;Employing experienced radiography researchers for mentorship ;Recognition at organizational level ;I receive support from department manager and/or higher management العليا;I receive support from my colleagues (other radiographers);	Insufficient time at work to conduct research;Lack of funding and other material resources;Lack of support from department manager and/or higher management;	5	5	5	5	5	5	5	5	3	3	5	None;
82	Male	35-44	Radiography	Southern Region	Public Hospital	Full time	6-10'	Bachelor degree	Radiographer in clinical practice	No	No	Yes	Writing the research protocol;Collecting the data;	To advance the profession of radiographers;	Under 5		2	2	2	3	2	2	3	5	I get research training opportunities ;I get assigned working time to conduct research;أI get funding and other material resources;I receive support from my colleagues (other radiographers);I receive support from department manager and/or higher management العليا;I receive support from other professionals (academics, physicists, radiologists);Employing experienced radiography researchers for ment…	Insufficient time at work to conduct research;Lack of funding and other material resources;Lack of support from my colleagues (other radiographers);Lack of support from department manager and/or higher management;Lack of support from other professionals (academics, physicists, radiologists);Lack of knowledge about potential research projects to participate البحثية المحتملة التي يمكن المشاركة بها;…	5	5	5	5	3	4	2	2	5	1	5	Other
83	Male	25-34	Radiography	Western Region	Public Hospital	Full time	0-5	Bachelor degree	Radiographer in clinical practice	No	No	No				I am not aware of the potential research projects to participate;There is no research culture at my workplace;Lack of time to engage in research at my workplace;	5	5	3	2	5	5	5	5	I get research training opportunities ;I get assigned working time to conduct research;أI get funding and other material resources;I receive support from my colleagues (other radiographers);I receive support from department manager and/or higher management العليا;I receive support from other professionals (academics, physicists, radiologists);	Insufficient time at work to conduct research;Lack of funding and other material resources;Lack of support from my colleagues (other radiographers);Lack of support from department manager and/or higher management;Lack of radiography research culture at workplace;	3	3	5	5	5	5	4	4	5	2	2	Presentations (oral and poster);
84	Female	25-34	Radiography	Western Region	Private Hospital	Full time	0-5	Bachelor degree	Radiographer in clinical practice	No	No	No				Lack of time to engage in research at my workplace;	3	3	3	3	4	3	4	4	I get assigned working time to conduct research;I get research training opportunities ;	Insufficient time at work to conduct research;Lack of knowledge about potential research projects to participate البحثية المحتملة التي يمكن المشاركة بها;	4	3	3	4	4	4	4	3	4	4	4	Presentations (oral and poster);
85	Male	35-44	Radiography	Eastern Region	Private Hospital	Full time	11-15'	Bachelor degree	Radiographer in clinical practice	Yes	No	No					3	3	2	3	2	2	2	2	I get research training opportunities;I get assigned working time to conduct research;I get funding and other material resources;I receive support from department manager and/or higher management;I receive support from my colleagues (other radiographers);Being a member of a research group;Recognition at organizational level;Employing experienced radiography researchers for mentorship;I receive su…	Lack of knowledge and skills to conduct research;Insufficient time at work to conduct research;Lack of interest and motivation;Lack of funding and other material resources;Lack of knowledge about potential research projects to participate;Lack of experienced radiography research mentors;قلة او انعدام ثقافة البحث في مكان العمل;	5	5	5	3	4	5	2	2	2	5	5	None;
86	Male	25-34	Radiography	Western Region	Private Hospital	Full time	6-10'	Doctoral degree	Manager or equivalent	Yes	No	Yes	Planning the study; Writing the research protocol; Applying for project funding ; Applying for ethical committee; Applying for hospital or other approval;Reviewing the background literature;توظيف المشاركين - Recruitment of participants;Collecting data;;Analyzing the data;Writing a scientific article; Presenting results in a conference;	For professional development;To enhance promotion prospects;To improve patient care;	Under 5		4	4	5	5	5	4	5	5	I get research training opportunities;I get funding and other material resources;I receive support from my colleagues (other radiographers);I receive support from department manager and/or higher management;	Insufficient time at work to conduct research;Lack of interest and motivation;Lack of funding and other material resources;Lack of support from department manager and/or higher management;	5	5	5	3	3	5	5	5	2	2	5	Published journal articles;Grant applications (successful and unsuccessful);Research student supervisionPresentations (oral and poster);
87	Male	45-54	Radiography	Southern Region	Private Hospital	Full time	16-20	Graduate diploma	Radiographer in clinical practice	Yes	No	Yes	Collecting the data; Analyzing the data;	As a part of working task For professional development;To enhance promotion prospects;	"5-10"		4	4	3	4	3	3	3	3	Being a member of a research group;Recognition at organizational level;	Lack of knowledge and skills to conduct research;Insufficient time at work to conduct research;Lack of funding and other material resources;	5	5	4	4	4	4	4	3	3	3	5	Research student supervision
88	Female	18-24	Radiography	Southern Region	Private Hospital	Full time	0-5	Bachelor degree	Radiographer in clinical practice	Yes	No	Yes	Writing a scientific article; Applying for hospital or other approval;	For professional development;To improve patient care;To advance the profession of radiographers;	Under 5		4	4	4	4	4	4	4	4	I get research training opportunities;I receive support from department manager and/or higher management;Being a member of a research group;	Lack of knowledge and skills to conduct research;Lack of funding and other material resources;Lack of experienced radiography research mentors;	5	4	4	4	4	4	4	4	4	4	4	Presentations (oral and poster);
89	Male	35-44	Radiography	Southern Region	Private Hospital	Full time	6-10'	Graduate diploma	Radiographer in clinical practice	No	No	Yes	Collecting data;;Planning the study;Writing the research protocol; Applying for project funding ;التقديم على اللجنة الأخلاقية - Applying for ethical committee;التقدم بطلب للحصول Applying for hospital or other approval;Reviewing the background literature;Analyzing the data;	To provide evidence based radiography practice;To enhance promotion prospects;As a part of working task	"5-10"		5	4	3	3	3	3	4	4	I get research training opportunities;I get assigned working time to conduct research;I get funding and other material resources;	Lack of knowledge and skills to conduct research;	5	4	4	4	4	4	4	5	4	4	4	Published journal articles;Grant applications (successful and unsuccessful);Research student supervisionPresentations (oral and poster);Chapter in a book;
90	Male	25-34	Radiography	Western Region	Private Hospital	Full time	0-5	Bachelor degree	Radiographer in clinical practice	No	No	No				I am not aware of the potential research projects to participate;	1	1	1	3	1	1	5	5	I get research training opportunities;Being a member of a research group;Recognition at organizational level;	Lack of knowledge and skills to conduct research;Lack of knowledge about potential research projects to participate;	5	5	5	5	5	5	5	5	1	1	1	Published journal articles;
91	Female	35-44	Radiography	Western Region	Private Hospital	Full time	0-5	Bachelor degree	Radiographer in clinical practice	No	No	No				Lack of time to engage in research at my workplace	3	3	3	3	3	3	3	3	Employing experienced radiography researchers for mentorship;	Insufficient time at work to conduct research;	3	3	3	3	3	3	3	3	3	3	3	None;
92	Male	18-24	Radiography	Western Region	Private Hospital	Full time	0-5	Bachelor degree	Radiographer in clinical practice	No	No	Yes	Reviewing the background literature;	To advance the profession of radiographers;	Under 5		3	3	2	4	3	3	3	3	I receive support from other professionals (academics, physicists, radiologists);Employing experienced radiography researchers for mentorship;Being a member of a research group;I receive support from department manager and/or higher management;I receive support from my colleagues (other radiographers);I get assigned working time to conduct research;	Lack of knowledge and skills to conduct research;Insufficient time at work to conduct research;قلة الدعم من الزملاء في العمل( أخصائي/فني التصوير الطبي (الأشعة التشخيصية));Lack of support from department manager and/or higher management;Lack of support from other professionals (academics, physicists, radiologists);Lack of knowledge about potential research projects to participate;قلة او انعدام ثقا…	5	5	5	4	4	5	5	5	4	4	5	None;
93	Female	25-34	Radiography	Middle Region	Private Hospital	Full time	6-10'	Bachelor degree	Radiographer in clinical practice	No	No	No				There is no research culture at my workplace;	4	4	4	5	4	3	4	4	I get funding and other material resources;	Lack of knowledge and skills to conduct research;Lack of support from department manager and/or higher management;قلة او انعدام ثقافة البحث في مكان العمل;	5	5	5	5	5	5	5	5	4	5	5	None;
94	Female	25-34	Radiography	Southern Region	Private Hospital	Full time	0-5	Bachelor degree	Radiographer in clinical practice	No	No	No				There is no research culture at my workplace;I am not aware of the potential research projects to participate;Research is not a part of my working task;	4	4	2	3	4	3	4	4	Recognition at organizational level;I get research training opportunities;Being a member of a research group;I get assigned working time to conduct research;	Lack of interest and motivation;Lack of experienced radiography research mentors;Lack of knowledge about potential research projects to participate;Lack of knowledge and skills to conduct research;	4	5	4	5	5	5	4	3	5	5	3	Published journal articles;
95	Male	35-44	Radiography	Western Region	Public Hospital	Full time	11-15'	Doctoral degree	Radiographer in clinical practice	Yes	No	Yes	Writing the research protocol;Applying for ethical committee;Planning the study;Reviewing the background literature; Applying for hospital or other approval;Collecting data;;Analyzing the data;Writing a scientific article;	For professional development;To improve patient care;To advance the profession of radiographers;	> 10		5	5	5	5	5	5	5	5	I get funding and other material resources;	Lack of interest and motivation;Lack of funding and other material resources;	5	5	5	2	3	5	4	3	3	4	5	Published journal articles;Research student supervision
96	Female	18-24	Radiography	Southern Region	Public Hospital	Full time	0-5	Bachelor degree	Radiographer in clinical practice	No	No	Yes	Planning the study; Recruitment of participants;Analyzing the data;Collecting data; Applying for ethical committee;	As a part of working task For professional development;To advance the profession of radiographers;	Under 5		3	3	3	3	3	3	3	3	I get research training opportunities;I get funding and other material resources;I receive support from other professionals (academics, physicists, radiologists);Being a member of a research group;Recognition at organizational level;Employing experienced radiography researchers for mentorship;	Lack of knowledge and skills to conduct research;Insufficient time at work to conduct research;Lack of funding and other material resources;قلة او انعدام ثقافة البحث في مكان العمل;Lack of experienced radiography research mentors;	3	4	4	4	3	4	4	3	3	4	3	Presentations (oral and poster);
97	Male	25-34	Radiography	Middle Region	Public Hospital	Full time	0-5	Bachelor degree	Radiographer in clinical practice	No	No	No				I don’t have sufficient skills for participating in research projects;	1	1	1	5	3	1	1	1	Employing experienced radiography researchers for mentorship;	Lack of knowledge and skills to conduct research;Lack of funding and other material resources;Insufficient time at work to conduct research;قلة او انعدام ثقافة البحث في مكان العمل;Lack of knowledge about potential research projects to participate;	5	5	4	1	2	2	1	1	5	5	5	Presentations (oral and poster);
98	Female	18-24	Radiography	Eastern Region	Public Hospital	Educational leave	0-5	Bachelor degree	Radiographer in clinical practice	Yes	Yes	Yes	Applying for project funding ; Applying for hospital or other approval;Collecting data;;Writing a scientific article;Presenting results in a conference;	For professional development;For economic interest;To provide evidence based radiography practice;	Under 5		5	3	5	3	3	4	5	3	I get assigned working time to conduct research;I receive support from my colleagues (other radiographers);I receive support from department manager and/or higher management;I receive support from other professionals (academics, physicists, radiologists);Employing experienced radiography researchers for mentorship;Recognition at organizational level;	Lack of knowledge and skills to conduct research;Lack of funding and other material resources;Lack of support from department manager and/or higher management;Lack of support from other professionals (academics, physicists, radiologists);Lack of experienced radiography research mentors;قلة او انعدام ثقافة البحث في مكان العمل;	5	4	3	4	5	4	3	4	5	4	3	Grant applications (successful and unsuccessful);Presentations (oral and poster);Chapter in a book;
99	Male	25-34	Radiography	Eastern Region	Public Hospital	Full time	0-5	Bachelor degree	Radiographer in clinical practice	No	No	No				Lack of time to engage in research at my workplace;I don’t have ideas for research projects;I don’t have sufficient skills for participating in research projects;	2	2	2	3	2	2	2	3	I get research training opportunities;I get assigned working time to conduct research;I receive support from department manager and/or higher management;I receive support from my colleagues (other radiographers);I get funding and other material resources;Employing experienced radiography researchers for mentorship;Recognition at organizational level;Being a member of a research group;	Lack of knowledge and skills to conduct research;Lack of interest and motivation;Lack of knowledge about potential research projects to participate;	5	5	5	4	5	5	3	2	3	3	4	None;
100	Female	35-44	Radiography	Southern Region	Public Hospital	Full time	6-10'	Doctoral degree	Radiographer in clinical practice	Yes	No	Yes	Applying for project funding ; Applying for ethical committee; Applying for hospital or other approval;	To enhance promotion prospects;	"5-10"		4	4	3	3	3	3	4	4	Employing experienced radiography researchers for mentorship;	Insufficient time at work to conduct research;	5	5	5	5	4	5	5	4	4	5	5	Published journal articles;
101	Female	25-34	Radiography	Western Region	Semi-public Hospital	Educational leave	0-5	Bachelor degree	Radiographer in clinical practice	No	Yes	Yes	Planning the study;	As a part of working task	Under 5		3	3	3	2	3	2	2	3	I receive support from my colleagues (other radiographers);I receive support from department manager and/or higher management;Being a member of a research group;I get research training opportunities;I get assigned working time to conduct research;	Lack of knowledge and skills to conduct research;Insufficient time at work to conduct research;قلة الدعم من الزملاء في العمل( أخصائي/فني التصوير الطبي (الأشعة التشخيصية));Lack of funding and other material resources;Lack of support from other professionals (academics, physicists, radiologists);Lack of support from department manager and/or higher management;قلة او انعدام ثقافة البحث في مكان العمل;	4	4	4	4	4	4	4	4	4	4	4	Presentations (oral and poster);
102	Male	35-44	Radiography	Western Region	Public Hospital	Full time	11-15'	Doctoral degree	Manager or equivalent	Yes	No	Yes	Applying for ethical committee; Applying for project funding ;Collecting data;;Analyzing the data;Writing a scientific article;	To enhance promotion prospects;For economic interest;	"5-10"		5	5	5	5	5	5	5	5	I receive support from my colleagues (other radiographers);I receive support from department manager and/or higher management;Being a member of a research group;I receive support from other professionals (academics, physicists, radiologists);Employing experienced radiography researchers for mentorship;	Insufficient time at work to conduct research;Lack of interest and motivation;Lack of funding and other material resources;Lack of support from department manager and/or higher management;Lack of experienced radiography research mentors;Lack of knowledge about potential research projects to participate;	5	5	5	1	4	4	3	1	1	3	5	Published journal articles;
103	Female	18-24	Radiography	Southern Region	Public Hospital	Educational leave	0-5	Bachelor degree	Radiographer in clinical practice	No	Yes	Yes	Planning the study;Writing the research protocol;	For economic interest;	Under 5		5	5	5	5	5	5	5	5	I get research training opportunities;	Lack of interest and motivation;	5	5	5	5	5	5	5	5	5	5	5	Chapter in a book;
104	Male	35-44	Radiography	Southern Region	Semi-public Hospital	Full time	11-15'	Doctoral degree	Radiographer in clinical practice	Yes	No	Yes	Planning the study;Writing the research protocol; Applying for project funding ;Applying for ethical committee;Applying for hospital or other approval;Reviewing the background literature; Recruitment of participants;Collecting data;;Analyzing the data;Writing a scientific article;Presenting results in a conference;	As a part of working taskTo enhance promotion prospects; For professional development;	> 10		5	4	4	4	5	4	4	4	I get research training opportunities;Being a member of a research group;	Lack of interest and motivation;Insufficient time at work to conduct research;	4	3	2	2	2	3	3	3	3	3	3	Published journal articles;Research student supervisionPresentations (oral and poster);Grant applications (successful and unsuccessful);
105	Male	25-34	Radiography	Eastern Region	Public Hospital	Full time	0-5	Masters degree	Radiographer in clinical practice	No	Yes	Yes	Writing a scientific article;	For professional development;To improve patient care;To provide evidence based radiography practice;	Under 5		4	5	4	4	4	2	4	4	I get research training opportunities;Being a member of a research group;	Lack of knowledge and skills to conduct research;	5	5	5	4	4	5	5	5	3	3	5	Published journal articles;
